# Supplementary material for: Manifestations and environmental implications of microbially-induced calcium carbonate precipitation (MICP) by the cyanobacterium &lt;i&gt;Dolichospermum flosaquae&lt;/i&gt;
Source: Copernicus journal article supplement (doi:10.5194/bg-2020-378), 2020-11-13

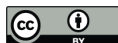

1 **Manifestations and environmental implications of microbially-induced calcium**  
2 **carbonate precipitation (MICP) by the cyanobacterium *Dolichospermum***  
3 ***flosaquae***

4 Refat Abdel-Basset<sup>1\*</sup>, Elhagag Ahmed Hassan<sup>1^</sup> and Hans-Peter Grossart<sup>2,3</sup>

5 <sup>1\*</sup> Botany and Microbiology Department, Faculty of Science, Assiut University, 71516  
6 Assiut (Egypt)

7 <sup>2</sup>Dept. Experimental Limnology, Leibniz Institute for Freshwater Ecology and Inland  
8 Fisheries, D-16775 Stechlin, Germany (hgrossart@igb-berlin.de)

9 <sup>3</sup>Dept. of Biochemistry and Biology, Potsdam University, 14469 Potsdam, Germany

10 <sup>^</sup> elhagaghassan@aun.edu.eg

11 Corresponding author: rbasset@aun.edu.eg

12

13 **Abstract:**

14 The aim of this work is to explore the ability and magnitude of the temperate  
15 cyanobacterium *Dolichospermum flosaquae* in MICP (microbially-induced calcium  
16 carbonate precipitation). Environmentally, MICP controls the availability of calcium,  
17 carbon and phosphorus in freshwater lakes and simultaneously controls carbon  
18 exchange with the atmosphere. Cultures of *flosaquae* were grown in BG11 medium  
19 containing 0, 1, 1.5, 2 and 4 mg Ca<sup>2+</sup> L<sup>-1</sup>, as cardinal concentrations previously  
20 reported in freshwater lakes, in addition to a control culture (BG11 containing 13 mg  
21 Ca<sup>2+</sup> L<sup>-1</sup>). Growth (cell number, chlorophyll a, and protein content) of *D. flosaquae* was  
22 generally reduced by elevating calcium concentrations of the different salts used  
23 (chloride, acetate, or citrate). *D. flosaquae* seems able to perform MICP as carbonate  
24 alkalinity was sharply induced up to its highest level (six times that of the control) at a  
25 citrate concentration of 4 mg Ca<sup>2+</sup> L<sup>-1</sup>. Calcium carbonate was formed at a pre-  
26 precipitation stage as the minimum pH necessary for precipitation (8.7) has been  
27 scarcely approached under such conditions. MICP took place mostly relying on  
28 photosynthesis and respiration, but not on urease activity, as urea was not  
29 supplemented in the growth media. However, *D. flosaquae* exhibited strong urease  
30 specific activity in *in vitro* assays (four times that of the control at 4 mg Ca<sup>2+</sup> citrate L<sup>-1</sup>  
31 <sup>1</sup>). Residual calcium exhibited its lowest value at 4 mg Ca<sup>2+</sup> citrate L<sup>-1</sup>, coinciding with  
32 the highest alkalinity level. Consumed calcium was increasing with chlorophyll a



33 content, but not with increasing cell numbers. The experiments should be repeated in  
34 a future study, but in the presence of urea, to evaluate the full potential of calcium  
35 carbonate precipitation of *D. flosaquae*, its dynamics and impact on biogeochemical  
36 cycles of calcium, carbon and phosphorus in freshwater lakes.

37 **Key Words:**

38 *Dolichospermum flosaquae* – MICP - Photosynthesis – Respiration – Urease –  
39 Alkalinity – Calcium

40 **Introduction:**

41 Microbially-induced calcium carbonate precipitation (MICP) depicts an exogenous or  
42 endogenous microbial activity that takes place during heterotrophic growth of  
43 numerous fungi and bacteria or during photoautotrophic growth of cyanobacteria in  
44 their natural environments including water, soils, tufas, biofilms or geological  
45 formations. Furthermore, bacterial, and cyanobacterial mucilaginous sheath (capsular  
46 polysaccharides or exopolysaccharides) as well as fungal chitin act as nucleation sites  
47 for CaCO<sub>3</sub> crystallization by binding Ca<sup>2+</sup> onto their carboxylic groups. MICP requires  
48 sufficient Ca<sup>2+</sup>, an alkaline pH and suitable microorganisms. Availability of nucleation  
49 sites is very important for stable and continuous calcium carbonate bio-mineralization  
50 (Phillips et al 2013). In particular, cyanobacteria are active prokaryotes performing  
51 MICP (Payandi-Rolland 2019; Xu et al 2019). Several metabolic processes such as  
52 photosynthesis, respiration, sulfate, nitrate or sulfide reduction have been recorded as  
53 driving mechanisms for MICP (e.g. Seifan et al 2019). However, ureolytic activity has  
54 been also found as a major mechanism catalyzing MICP via CO<sub>2</sub> and ammonia  
55 production during urea hydrolysis. Castro-Alonso et al (2019) reported on a series of  
56 complex reactions of urease, calcium, and carbonate during MICP surrounding the  
57 cells. Ca<sup>2+</sup>, beside being a component of CaCO<sub>3</sub>, is inductive for urease activity  
58 resulting in a pronounced upregulation. Furthermore, morphology of the calcite crystal  
59 is strain-specific (Hammes et al 2003) and depends on the type of the calcium salt  
60 present (Achal and Pan 2014).

61 Subsequent to precipitation of calcium carbonate, the bioavailability of both calcium  
62 and phosphorus as well as CO<sub>2</sub> are lowered in lakes; which, in turn, arises as rate-  
63 limiting to growth and nutrition of aquatic microbiota, e.g. via photosynthetic activity in  
64 the case of cyanobacteria. This metabolic process is widely explored and regarded as



65 a promising phenomenon for use in various industrial applications. In addition to the  
66 governmental control of acid deposition into lakes, MICP may be responsible (at least  
67 in part) for the widespread threat of calcium decline in freshwater lakes around the  
68 globe, as calcium co-precipitates simultaneously with carbonate (Jeziorski and Smol  
69 2017). After studying thousands of water samples in tens of countries (spatially and  
70 temporally), Weyhenmeyer et al (2019) concluded that the global median calcium  
71 concentration was  $4.0 \text{ mg L}^{-1}$  with 20.7% of the water samples showing  $\text{Ca}^{2+}$   
72 concentrations  $\leq 1.5 \text{ mg L}^{-1}$ , a threshold considered critical for the survival of many  
73  $\text{Ca}^{2+}$  dependent organisms.

74 The hypothesis of this work is to explore whether *Dolichospermum flosaquae*, a major  
75 temperate cyanobacterium, is able to perform MICP in freshwater lakes. Dependence  
76 of MICP magnitude on  $\text{Ca}^{2+}$  concentration and salt type of chloride, acetate or citrate  
77 as well as the powering metabolic process are also concerned within this study.  
78 Photosynthesis, respiration, total alkalinity and urease activity of *D. flosaquae* are  
79 measurables assessed to elucidate their role in mediating MICP and to detect the  
80 effect of the applied treatments. The results obtained are discussed on the lights of  
81 their anticipated environmental impact and implications.

82

### 83 **Materials and Methods:**

#### 84 Experimental Set up:

85 Cultures of the cyanobacterium *D. flosaquae* were incubated at different  $\text{Ca}^{2+}$   
86 concentrations (0, 1, 1.5, 2 and  $4 \text{ mg Ca}^{2+} \text{ L}^{-1}$ ) of different salts (chloride “Cl”, acetate  
87 “Ac”, or citrate “Cit”) supplemented into calcium free BG11 medium specific for  
88 cyanobacteria (Stanier et al 1971). *D. flosaquae* was also grown in full BG11 medium  
89 (containing  $13 \text{ mg Ca}^{2+} \text{ L}^{-1}$ , which is considered the control culture “Con+”) in addition  
90 to a reference calcium-deprived culture (BG11 devoid of any supplemental calcium  
91 “Con-”). Culture media were inoculated with 10 ml of 5 days old cells of *D. flosaquae*  
92 in conical flasks capped with aluminum foil. Cultures were shaken for 4 weeks at  $22 \pm 1$   
93 °C and white light intensity of  $25 \mu\text{mole m}^{-2} \text{ sec}^{-1}$  (14h light:10h dark cycle).

94

#### 95 Analytical Methods:



96 At the end of the experiment, i.e. after growth for 4 weeks, the following parameters of  
97 the variously treated *D. flosaquae* cultures were analyzed and assessed as follows:

98 - Cell number and chlorophyll a were simultaneously assessed using a YSI-  
99 multiparameter probe.

100 - Protein contents were estimated according to the method of **Bradford** (1976). Cells  
101 were extracted in boiled water, centrifuged and proteins were assessed in the  
102 supernatant. The binding of protein molecules with the Coomassie Brilliant Blue dye  
103 under acidic conditions results in a color change from brown to blue, measured at a  
104 wavelength of 595 nm using a BioTek Synergy 2, multidetector microplate reader  
105 (Vermont, USA).

106

107 - Total alkalinity was assessed by titration of 50 mL algal culture media with 0.1M HCl  
108 following **Choi** et al (2017) and **Xu** et al (2019), and then calculated using the  
109 following equation:

110

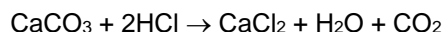

111 Based on the reaction stoichiometry between  $\text{CaCO}_3$  and HCl, the mole ratio of  $\text{CaCO}_3$   
112 to HCl is 1:2; by dividing the number of moles of HCl by 2, the product is the number  
113 of moles of  $\text{CaCO}_3$ . The number of moles of  $\text{CaCO}_3$  would be multiplied with its  
114 molecular weight to get the yielded respective  $\text{CaCO}_3$  mass.

115 - Photosynthetic activity: The light-induced  $\text{O}_2$  evolution by *D. flosaquae* in different  
116 cultures was followed by means of an oxygen sensor (PreSens MicroXTX3O<sub>2</sub>  
117 sensor, SoftwareTx3v6O<sub>2</sub>, Presens, Germany) at the same growth conditions (white  
118 light intensity of about  $25 \mu\text{mole m}^{-2} \text{sec}^{-1}$  at room temperature, i.e.  $22 \pm 1^\circ\text{C}$ ).  
119 Respiration ( $\text{O}_2$  uptake) was also monitored using the same oxygen sensor, but in  
120 the dark.

121

122 - Assessment of residual free  $[\text{Ca}^{2+}]$  in the growth media: At the end of the experiment,  
123 calcium was assayed by calcium kits (ab102505, Calcium Detection Assay Kit-  
124 colorimetric, abcam) and determined at a wave length of 575 nm using a BioTek  
125 Synergy 2, multidetector microplate reader (Vermont, USA). Consumed calcium was  
126 then calculated by subtracting residual from total calcium.

127



128 - Urease enzyme (UE) activity was assayed spectrophotometrically following the  
129 procedure of **Mobley** et al (1988) and quantified using a calibration curve of  
130 ammonia. The in vitro assay mixture of UE contained intact cells of *D. flosaquae*,  
131 urea (200 mM), phenol red ( $7 \mu\text{g mL}^{-1}$ ) and phosphate buffer (pH 6.8). After 10 min,  
132 the developed color, as a result of liberated ammonia from urea hydrolysis, was  
133 determined at a wavelength of 500 nm using the same microplate reader (as  
134 described above).

135

136 - Ammonia accumulated in the different culture media at the end of the experimental  
137 period was assessed as mentioned above in urease-liberated ammonia.

138

139 - The pH values of the differently treated cultures were determined via a pH meter  
140 (WTW3301, Germany).

141

142 All experiments and assessments were conducted in triplicates and the mean values  
143  $\pm$  SE (standard error) are presented in the figures.

144

#### 145 **Results:**

146 Under culture conditions, growth indices (cell number, chlorophyll - and protein  
147 contents) of *D. flosaquae* were variably affected in response to calcium concentration  
148 as well as to its counter anion (chloride, acetate, or citrate). Growth of *D. flosaquae*  
149 decreased as calcium concentrations of all salts were lowered, following a relative  
150 growth enhancement (higher than the control) at a threshold value of  $1.5\text{-}2.0 \text{ mg Ca}^{2+}$   
151  $\text{L}^{-1}$  of the calcium salts citrate and acetate, respectively, while continually lowered by  
152 calcium chloride. Calcium-deprived cultures (Co-) exhibited markedly lower growth  
153 rates than  $\text{Ca}^{2+}$  supplemented ones (Co+) in terms of cell number, chlorophyll a and  
154 protein contents (Fig. 1).

155 The pH of 7.0 was set for all *D. flosaquae* cultures at the beginning of the experiment;  
156 thereafter, it was elevated to levels ranging between pH 8.0 - 8.7, depending on  
157 calcium treatment (Fig. 2). A certain calcium concentration of each salt induced a  
158 higher pH than control or calcium-deprived cultures. The highest pH elevation (up to  
159 8.7) occurred at calcium chloride and calcium citrate concentrations of  $1 \text{ mg Ca}^{2+} \text{ L}^{-1}$



160 but decreased at higher concentrations. However,  $\text{Ca}^{2+}$  acetate resulted in the highest  
161 pH elevation of 8.7 at the highest added concentration ( $4 \text{ mg Ca}^{2+} \text{ L}^{-1}$ ). Accordingly,  
162 the pH elevation depended on the calcium concentrations and type of  $\text{Ca}^{2+}$  salt  
163 (chloride, acetate or citrate).

164

165 Fig. (3) presents the net photosynthetic oxygen evolution ( $P_N$ ) and dark respiratory  
166 oxygen uptake ( $R_D$ ) of *D. flosaquae* in dependence on the imposed calcium  
167 treatments.  $P_N$  was severely inhibited in calcium deprived cultures of *D. flosaquae*  
168 relative to control cultures while  $R_D$  was enhanced. Different calcium salts exerted  
169 different impacts, but in most calcium treatments, net photosynthetic oxygen evolution  
170 was higher than in the control cultures. In calcium chloride and acetate treated cultures  
171 of *D. flosaquae*,  $P_N$  and  $R_D$  enhanced with increased concentrations of calcium while  
172 in citrate treated *D. flosaquae* cultures, both  $P_N$  and  $R_D$  decreased.  
173 Photosynthesis:respiration ( $P_N:R_D$ ) ratios, which represent the net productivity of cells  
174 or cultures, were severely inhibited by calcium deprivation while calcium chloride,  
175 acetate and citrate induced inhibition or stimulation of  $P_N:R_D$ , depending on the calcium  
176 concentration.

177

178 Total alkalinity (T alkalinity), ammonia as well as corrected carbonate alkalinity values  
179 (C alkalinity), calculated by subtracting ammonia concentration from total alkalinity of  
180 the differently treated *D. flosaquae* cultures, are shown in Fig. (4). Total alkalinity  
181 exhibited its absolutely lowest amount in the control culture of *D. flosaquae*, despite it  
182 contained the highest  $\text{Ca}^{2+}$  concentration ( $13 \text{ mg Ca}^{2+} \text{ L}^{-1}$ ) while calcium deprivation  
183 remarkably enhanced alkalinity up to three times that of the control cultures (5 to 15  
184  $\text{mmol carbonate } \mu\text{g Chl}^{-1}$ ). Furthermore, alkalinity level in any of the calcium treated  
185 cultures was markedly higher than that of control or calcium-deprived cultures, with a  
186 maximum alkalinity level at calcium citrate concentration of  $4 \text{ mg Ca}^{2+} \text{ L}^{-1}$ . All calcium  
187 acetate concentrations induced more or less similar alkalinity levels whereas calcium  
188 chloride induced its highest stimulation at  $2 \text{ mg Ca}^{2+} \text{ L}^{-1}$ . As ammonia may interfere  
189 with carbonate alkalinity, ammonia has been assessed and detected in trace amounts  
190 not affecting total alkalinity (Fig. 4).



191 Residual calcium was assessed while total and consumed fractions were calculated  
192 (per mL culture and per unit chlorophyll) and presented in Fig. (5a&b); consumed  
193 calcium means its incorporation into or precipitation as calcium carbonate. It is  
194 important to mention that in calcium-deprived cultures, i.e. without any external  
195 supplementation, calcium concentration was still  $2.26 \text{ mg Ca}^{2+} \text{ L}^{-1}$ , nevertheless. This  
196 amount might have been released from cellular apoplastic regions as well as from  
197 intracellular stores. Therefore, a virtual concentration of total calcium is given to  
198 account for the externally supplemented concentration of calcium (0, 1, 1.5, 2 or 4 mg  
199  $\text{Ca}^{2+} \text{ L}^{-1}$ ) and the amount of calcium found at calcium-deprivation (i.e.  $2.26 \text{ mg Ca}^{2+} \text{ L}^{-1}$ )  
200  $^1$ ), which was assumed to be equally released by each culture. Control cultures  
201 displayed the highest levels of all calcium fractions as they started at the highest total  
202 virtual concentration of  $15.26 \text{ mg Ca}^{2+} \text{ L}^{-1}$  (i.e.  $13 \text{ mg Ca}^{2+} \text{ L}^{-1}$  in BG11 plus  $2.26 \text{ mg}$   
203  $\text{Ca}^{2+} \text{ L}^{-1}$  released). On the contrary, calcium-deprived cultures exhibited the lowest  
204 levels of all calcium fractions since no calcium had been added and thus the released  
205 calcium was the only calcium resource.

206 Residual calcium (in the culture media) and consumed calcium (per unit chlorophyll  
207 and per unit volume) increased with elevated calcium additions (Fig 5a). The lowest  
208 amounts of residual calcium were recorded in citrate treated cultures (almost equal to  
209 the consumed fraction and about 50% of total calcium). The concentration of  $4 \text{ mg}$   
210  $\text{citrate L}^{-1}$  enhanced the calcium consumption nearly up to that of the control despite  
211 the big difference in the externally supplemented calcium concentration (4 vs.  $13 \text{ mg}$   
212  $\text{Ca}^{2+} \text{ L}^{-1}$ , respectively). In chloride and acetate, residual calcium was considerably  
213 higher indicating less incorporation into calcium carbonate. Consumed calcium per  
214 unit chlorophyll (C/Chl) was increasing with increasing supplemented calcium  
215 concentration; the highest enhancement was recorded at citrate (Fig 5b).

216

217 Urease enzyme (UE) activity is presented in Fig (6); specific activity “SA” represents  
218 the rate of enzyme activity as  $\mu\text{mole ammonia released. } \mu\text{g}^{-1} \text{ protein. min}^{-1}$  while total  
219 activity “TA” represents the rate of enzyme activity as  $\mu\text{mole ammonia released. mL}^{-1}$   
220  $\text{algal suspension. min}^{-1}$ . Total activity is the product of specific activity per  $\mu\text{g protein}$   
221 multiplied by the amount of protein per unit volume (mL) of algal cultures. Calcium  
222 deprivation inhibited UE activity; the magnitude of inhibition on a volume basis “TA”



223 was more pronounced than the enzyme specific activity “SA” because enzyme  
224 (protein) contents were also lower. Calcium chloride induced the highest rates of UE,  
225 total and specific activity, at 1.5 mg Ca<sup>2+</sup> L<sup>-1</sup>; otherwise, it was inhibitory at lower or  
226 higher concentrations. Calcium acetate induced the highest rates of “TA” and “SA” at  
227 moderate concentrations of 1.5 and 2 mg Ca<sup>2+</sup> L<sup>-1</sup>, both lowest and highest  
228 concentrations of 1 and 4 mg Ca<sup>2+</sup> L<sup>-1</sup> severely inhibited the enzyme activity. Calcium  
229 citrate induced a continuous increase in urease activity (SA) up to its “absolutely”  
230 highest rate at 4 mg Ca<sup>2+</sup> L<sup>-1</sup> among other concentrations and salts; such highest rate  
231 of urease activity was in accordance with the highest level of calcium consumption i.e.  
232 calcium may be inductive to urease activity in *D. flosaquae*. The order of UE  
233 enhancement was as follows citrate > acetate > chloride.

234

#### 235 **Discussion:**

236 Our results indicate that *Dolichospermum flosaquae* is able to perform MICP  
237 (microbially-induced calcium carbonate precipitation). Therefore, the intensive blooms  
238 of this organism have the potential to control the overall biogeochemistry dynamics in  
239 freshwater bodies, i.e. controlling the availability of calcium, carbon, and phosphorus  
240 in addition to carbon emissions into the atmosphere. In this work, the capability of the  
241 cyanobacterium *D. flosaquae* in freshwater MICP was studied at different  
242 concentrations of three calcium salts (chloride, acetate, and citrate). It proved that  
243 different salt types and calcium concentrations exerted different impacts on *D.*  
244 *flosaquae* growth and metabolism. The studied concentrations (0, 1, 1.5, 2 and 4 mg  
245 Ca<sup>2+</sup> L<sup>-1</sup>) are critical depending on previous records in the literature. In this context,  
246 Weyhenmeyer et al (2019) reported that the global median calcium concentration was  
247 4.0 mg L<sup>-1</sup> with 20.7% of the water samples showing Ca<sup>2+</sup> concentrations of ≤ 1.5 mg  
248 L<sup>-1</sup>, a threshold considered critical for the survival of many organisms. Growth of *D.*  
249 *flosaquae* in terms of cell number, protein – and chlorophyll a content, was inhibited  
250 by calcium deprivation as well as by higher concentrations of calcium. However,  
251 concentrations of only 1.5 mg Ca<sup>2+</sup> L<sup>-1</sup> of acetate and citrate were stimulatory for *D.*  
252 *flosaquae* growth.

253 *D. flosaquae* seems able to perform MICP, as inferred from alkalinity levels in the  
254 growth media, elevated pH values, and residual vs. consumed calcium levels.



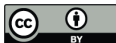

255 However, MICP occurred but at a pre-precipitation stage since no precipitation has  
256 been seen by naked eyes, due to the inability of the organism to surpass the minimum  
257 pH threshold under our experimental conditions of inactive urease due to absence of  
258 urea (discussed later). Therefore, ammonia concentrations were found to be marginal  
259 in the culture media. Its interference with carbonate alkalinity can be thus ruled out  
260 indicating that the assessed alkalinity levels are substantially carbonate alkalinity.  
261 Carbonate alkalinity exhibited the lowest levels at control cultures but increased via  
262 calcium deprivation. However, it was induced up to its maximum level (six times that  
263 of the control) by the highest calcium concentration of the citrate salt ( $4 \text{ mg Ca}^{2+} \text{ L}^{-1}$ ).  
264 This notion suggests that the capacity of *D. flosaquae* for carbonate formation  
265 depends on the salt type as well as on the  $\text{Ca}^{2+}$  concentration. In this respect, calcium  
266 chloride has been recorded to be the best salt for the production of calcite by *Bacillus*  
267 sp. among several other calcium sources used (Achal and Pan 2014). In this work,  
268 however, calcium citrate apparently fits the studied organism more than chloride or  
269 acetate.

270 Alkaline pH is a prerequisite for calcium carbonate formation and stability. Most calcite  
271 precipitation occurs under alkaline conditions of pH 8.7 to 9.5 (Ferris et al 2003;  
272 Dupraz et al 2009). When pH levels decrease, carbonates tend to dissolve rather than  
273 precipitate (Loewenthal and Marais 1982). *D. flosaquae* exhibited a continuous ability  
274 of elevating the pH of the culture medium to high pH values, which in turn, may have  
275 caused a slow and long lag phase of growth, but favorable conditions for MICP.  
276 However, as long as the pH of the cultures did not surpass 8.7, i.e. the lowest pH for  
277 precipitation, carbonate has been formed but did not precipitate (see references  
278 above: Loewenthal and Marais 1982; Ferris et al 2003; Dupraz et al 2009; Gebauer  
279 et al 2010).

280 Amongst the multiple microbial metabolic activities described in the literature to  
281 support MICP (e.g. Anbu et al 2016), that of *D. flosaquae* mostly relied on  
282 photosynthesis and respiration under conditions of this work. Urease activity, the most  
283 universal metabolic process powering MICP, is unlikely in this case, as the growth  
284 media was not supplemented with urea. UE activity is a potentially major source of  
285 ammonia (shifting the pH around the cell to the alkaline side) and  $\text{CO}_2$  (transforming  
286 into calcium carbonate precipitates).



287 UE activity is a potentially major source of ammonia (shifting the pH around the cell to  
288 the alkaline side); meanwhile  $\text{CO}_2$  and  $\text{Ca}^{2+}$  transform into calcium carbonate  
289 precipitates. Urea hydrolysis via UE activity is not complex (**Hammes** et al 2003;  
290 **Achal** et al 2011; **Stabnikov** et al 2013). However, the high ability of *D. flosaquae* to  
291 shift the pH to alkalinity, without urea being included in the culture medium, indicates  
292 sources of alkalinity other than the urease-dependent ammonia production, i.e.  
293 photosynthesis and respiration in our case. In this context, aerobic bacteria release  
294  $\text{CO}_2$  via cell respiration, which is paralleled by an increase in pH due to ammonia  
295 production (**Ng** et al 2012). **Hamilton** et al (2009) stated that lakes in carbonate-rich  
296 watersheds commonly precipitate calcium carbonate as calcite; this is accelerated by  
297 photosynthetic uptake of carbon dioxide, elevating the pH to 9–10 and reducing  
298 concentrations of calcium and alkalinity by up to 60%. However, urea hydrolytic strains  
299 showed higher calcite precipitation (~20–80%) in comparison with other metabolic  
300 pathways (**Achal** et al 2009). **Okwadha** and Li (2010) reported that the amount of  
301  $\text{CaCO}_3$  precipitation depends more on  $\text{Ca}^{2+}$  concentrations than urea concentrations.  
302 The *in vitro* assay of UE (EC 3.5.1.5), per se, was also affected by calcium  
303 concentration and salt type, i.e. it was inhibited by calcium deprivation while it exhibited  
304 maxima at 1.5, 2 and 4 mg  $\text{Ca}^{2+} \text{L}^{-1}$  for chloride, acetate, and citrate, respectively.  
305 Calcium induces UE activity; **Hammes** et al (2003) found that UE activity increased by  
306 tenfold in the presence of 30 mM  $\text{Ca}^{2+}$  relative to its absence. UE activity is related to  
307 cell (**Ng** et al 2012), urea and calcium concentrations (**De Muyneck** et al 2010), and  
308 high pH (**Jones** et al 1982). In addition, UE is only active at high pH values specific  
309 for urea hydrolysis. It has been reported that the optimum pH for UE is 8.0, above  
310 which the enzyme activity decreases (**Stocks-Fischer** et al 1999; **Gorospe** et al 2013).  
311 In this work, the results indicate that UE activity of *Dolichospermum flosaquae* was  
312 enhanced due to an increase in specific activity of the enzyme rather than to higher  
313 cell numbers or biomass. Urease and carbonic anhydrase expression and activities  
314 are genetically and synergistically co-regulated for MICP (**Dhami** et al 2014; **Castro-**  
315 **Alonso** et al 2019).

316 Residual calcium was the least in citrate-treated cultures, compared with other salts  
317 (chloride or acetate). At 4 mg  $\text{Ca}^{2+} \text{L}^{-1}$  of citrate, in particular, the lowest residual  $\text{Ca}^{2+}$   
318 level coincided with the highest alkalinity level, indicating its transformation to calcium  
319 carbonate. Consumed calcium per unit chlorophyll a was increased to its highest level



320 also at 4 mg Ca<sup>2+</sup> L<sup>-1</sup> of citrate treated cultures. Actually, Ca<sup>2+</sup> is not likely utilized by  
321 metabolic processes, but accumulates outside the cells where it is readily available for  
322 CaCO<sub>3</sub> precipitation (**Silver** et al 1975). In this work, however, the unique and superior  
323 stimulating effect of 4 mg Ca<sup>2+</sup> L<sup>-1</sup> calcium citrate compared with other salts (chloride  
324 or acetate) implies intracellular intervention of calcium ions as well as the  
325 accompanying anion in the intracellular metabolism. In this respect, citrate may serve  
326 as a carbon source and internal buffer.

327

### 328 **Conclusions:**

- 329 • *D. flosaquae*, a major representative of temperate freshwater cyanobacteria,  
330 contributes to the microbially-induced calcium carbonate precipitation (MICP) with  
331 pronounced consequences for Ca<sup>2+</sup> availability in freshwater lakes as well as  
332 carbon emissions to the atmosphere.
- 333 • Carbonate was formed but did not precipitate, as the organism could not increase  
334 the pH of the cultures beyond 8.7, which is considered the minimum pH value for  
335 calcite precipitation. Although it is not a precipitate, the formed calcium carbonate  
336 proves CO<sub>2</sub> and calcium sequestration.
- 337 • The mechanism(s) powering MICP seem to be photosynthesis and respiration  
338 without the participation of urease activity (as urea was not supplemented).  
339 However, UE activity elucidated a strong activity at our in vitro assays, which might  
340 maximally operate for MICP in cases of urea supplementation.
- 341 • Calcium citrate, particularly at 4 mg Ca<sup>2+</sup> L<sup>-1</sup> was the most inductive for MICP. For  
342 the emerging MICP-dependent technologies, it is therefore, recommended to apply  
343 calcium citrate because it shows outstanding enhancement of the process.
- 344 • The results can be used in modelling the environmental implications of MICP for  
345 biogeochemical cycles of calcium, carbon and phosphorus in freshwater lakes.

346

347

### 348 **Figure legends:**

349 **Figure (1):** Growth (cell number (10<sup>3</sup> cells mL<sup>-1</sup>), chlorophyll (x10<sup>-3</sup> µg mL<sup>-1</sup>) and protein  
350 contents (µg mL<sup>-1</sup>) of the cyanobacterium *Dolichospermum flosaquae* as influenced



351 by various calcium treatments: Control (B), 0, 1, 1.5, 2 and 4 mM of calcium chloride  
352 (C), calcium acetate (A) and calcium citrate (Ct). Control cultures were grown in BG11  
353 medium containing 13 mg Ca<sup>2+</sup> L<sup>-1</sup> (chloride), 0 is calcium deprived, i.e. not  
354 supplemented with any external calcium.

355

356 **Figure (2):** pH changes of the cyanobacterium *Dolichospermum flosaquae* as  
357 influenced by calcium treatments (as in figure 1).

358

359 **Figure (3):** Photosynthesis and respiration rates of the cyanobacterium  
360 *Dolichospermum flosaquae* as influenced by calcium treatments (as in figure 1).

361

362 **Figure (4):** Total alkalinity (carbonate and ammonia as mmol. µg Chl<sup>-1</sup>) of the  
363 cyanobacterium *Dolichospermum flosaquae* as influenced by calcium treatments (as  
364 in figure 1).

365

366 **Figure (5):** Residual (mg L<sup>-1</sup>), total (mg L<sup>-1</sup>) and consumed calcium (mg L<sup>-1</sup> or µg µg  
367 Chl a<sup>-1</sup>) of the cyanobacterium *Dolichospermum flosaquae* as influenced by calcium  
368 treatments (as in figure 1).

369

370 **Figure (6):** Urease activity, T (total) and SA (Specific Activity) of the cyanobacterium  
371 *Dolichospermum flosaquae* as influenced by calcium treatments (as in figure 1).

372

### 373 **Acknowledgment:**

374 Prof. Dr. R. Abdel-Basset sincerely thanks the Alexander von Humboldt Stiftung for  
375 the generous financial coverage of his research stay in the lab of Prof. Dr. H. P.  
376 Grossart, Leibniz IGB Berlin, and thanks to the MIBI group for their help.

377

### 378 **References:**

379 **Achal V.** and Pan X. (2014): Influence of calcium sources on microbially induced  
380 calcium carbonate precipitation by *Bacillus* sp. CR2. Appl Biochem.  
381 Biotechnol.173:307–317. doi: 10.1007/s12010-014-0842-1.

382 **Achal V.,** Mukherjee A., Basu P.C. and Reddy M.S. (2009): Strain improvement of  
383 *Sporosarcina pasteurii* for enhanced urease and calcite production. J Ind  
384 Microbiol. Biotechnol.;36:981–988. doi: 10.1007/s10295-009-0578-z.



- 385 **Achal** V., Pan X. and Zhang D. (2011): Remediation of copper-contaminated soil by  
386 *Kocuria flava* CR1 based on microbially induced calcite precipitation. *Ecol. Eng.*  
387 37:1601–1605. doi: 10.1016/j.ecoleng.2011.06.008.
- 388 **Anbu** P., Kang C.H., Shin Y.J. and So J.S. (2016): Formations of calcium carbonate  
389 minerals by bacteria and its multiple applications. *Springer Plus* 5:250. doi:  
390 10.1186/s40064-016-1869-2.
- 391 **Bradford** M. M. (1976): A rapid and sensitive method for the quantitation of microgram  
392 quantities of protein utilizing the principle of protein-dye binding. *Anal Biochem.*  
393 72, 248-254.
- 394
- 395 **Castro-Alonso** M.J., Montañez-Hernandez L.E., Sanchez-Muñoz M.A., Franco  
396 M.R.M., Narayanasamy R. and Balagurusamy N. (2019): Microbially induced  
397 calcium carbonate precipitation (MICP) and its potential in bioconcrete:  
398 Microbiological and Molecular Concepts. *Front. Mater.*, 6(126):  
399 <https://doi.org/10.3389/fmats.2019.00126>.
- 400
- 401 **Choi** S.-G., Park S.-G., Wu S. and Chu J. (2017): Methods for calcium carbonate  
402 content measurement of biocemented soils. *J. Mater. Civ. Eng.* 29(11):  
403 06017015(1-4).
- 404 De **Muyneck** W., De Belie N. and Verstraete W. (2010): Microbial carbonate  
405 precipitation in construction materials: a review. *Ecol Eng.* 36:118–136. doi:  
406 10.1016/j.ecoleng.2009.02.006.
- 407
- 408 **Dhami** N. K., Reddy M. S. and Mukherjee A. (2014): Application of calcifying bacteria  
409 for remediation of stones and cultural heritages. *Front. Microbiol.* Vol. 5:304. doi:  
410 10.3389/fmicb.2014.00304.
- 411 **Dupraz** S., Menez B., Gouze P., Leprovost R., Benezeth P., Pokrovsky O.S. and  
412 Guyot F. (2009): Experimental approach of CO<sub>2</sub> biomineralization in deep saline  
413 aquifers. *Chem Geol.* 265:54–62. doi: 10.1016/j.chemgeo.2008.12.012.
- 414 **Ferris** F.G., Phoenix V., Fujita Y. and Smith R.W. (2003): Kinetics of calcite  
415 precipitation induced by ureolytic bacteria at 10 to 20 °C in artificial groundwater.  
416 *Geochim. Cosmochim. Acta.* 67:1701–1710.



- 417 **Gebauer** D., Gunawidjaja P.N., Peter Ko J.Y., Bacsik Z., Aziz B., Liu L., Hu Y.,  
418 Bergstrom L., Tai C.W., Sham T.K., Eden M. and Hedin N. (2010): Proto-calcite  
419 and proto-vaterite in amorphous calcium carbonates. *Angew Chem Int Ed.*  
420 49:8889–8891. doi: 10.1002/anie.201003220.
- 421 **Gorospe** C.M., Han S.H., Kim S.G., Park J.Y., Kang C.H., Jeong J.H. and So J.S.  
422 (2013): Effects of different calcium salts on calcium carbonate crystal formation by  
423 *Sporosarcina pasteurii* KCTC 3558. *Biotechnol. Bioproc. Eng.* 18:903–908. doi:  
424 10.1007/s12257-013-0030-0.
- 425 **Hamilton** S.K., Bruesewitz D.A., Horst G.P., Weed D.B. and Sarnelle O. (2009):  
426 Biogenic calcite–phosphorus precipitation as a negative feedback to lake  
427 eutrophication. *Can. J. Fish. Aquat. Sci.*, 66: 343–350.
- 428 **Hammes** F, Boon N, de Villiers J, Verstraete W and Siciliano SD. (2003): Strain-  
429 specific ureolytic microbial calcium carbonate precipitation. *Appl Environ*  
430 *Microbiol.* 69:4901–4909. doi: 10.1128/AEM.69.8.4901-4909.2003.
- 431 **Jeziorski** A. and Smol J.P. (2017): The ecological impacts of lake water calcium  
432 decline on soft water boreal ecosystems. *Environ. Rev.*, 25: 245-253.
- 433 **Loewenthal** R. E., and Marais G.V.R. (1982): Carbonate chemistry of aquatic  
434 systems, In **H.-J. Walther** (ed.). *Theorie and Application*, V.1, 433 pp. USA,  
435 Michigan, Collingwood, Ann Arbor Scienc Publishers, Third Printing 1982. ISBN 0  
436 – 250 – 40141 - X
- 437 **Mobley** H.L.T., Cortesia M.J., Rosenthal L.E. and Jones B.D. (1988):  
438 Characterization of urease from *Campylobacter pylori*. *Journal of Clinical*  
439 *Microbiology*, 26(5): 831-836.
- 440
- 441 **Ng** S.W., Lee M.L. and Hii S.L. (2012): An overview of the factors affecting microbial-  
442 induced calcite precipitation and its potential application in soil improvement.  
443 *World Acad Sci Eng Technol.* 62:723–729.
- 444 **Okwadha** GDO and Li J. (2010): Optimum conditions for microbial carbonate  
445 precipitation. *Chemosphere* 81:1143–1148. doi:  
446 10.1016/j.chemosphere.2010.09.066.



- 447 **Phillips** A.J., Gerlach R, Lauchnor E, Mitchell AC, Cunningham AB, Spangler L.  
448 (2013): Engineered applications of ureolytic biomineralization: a review.  
449 *Biofouling*; 29(6):715-33. doi: 10.1080/08927014.2013.79655.
- 450 **Payandi-Rolland** D., Roche A., Vennin E., Visscher P.T., Suchet P.A., Camille  
451 Thomas C. and Bundeleva I.A. (2019): Carbonate precipitation in mixed  
452 cyanobacterial biofilms forming freshwater microbial tufa. *Minerals* 2019, 9, 409:  
453 1-20; doi:10.3390/min9070409.
- 454 **Salek** S.S., Bozkurt O.D., van Turnhout A.G., Kleerebezem R. and van Loosdrecht  
455 M.C.M. (2016): Kinetics of CaCO<sub>3</sub> precipitation in an anaerobic digestion process  
456 integrated with silicate minerals. *Ecological Engineering* 86: 105-112.  
457
- 458 **Seifan** M., Berenjian A. and Aydin B. (2019): Microbially induced calcium carbonate  
459 precipitation: a widespread phenomenon in the biological world. *Applied*  
460 *Microbiology and Biotechnology*. 103. 10.1007/s00253-019-09861-5.
- 461 **Silver** S, Toth K. and Scribner H. (1975): Facilitated transport of calcium by cells and  
462 subcellular membranes of *Bacillus subtilis* and *Escherichia coli*. *J Bacteriol.*  
463 122:880–885.
- 464 **Stabnikov** V., Jian C., Ivanov V and Li Y. (2013): Halotolerant, alkaliphilic urease-  
465 producing bacteria from different climate zones and their application for  
466 biocementation of sand. *World J Microbiol Biotechnol.* 29:1453–1460. doi:  
467 10.1007/s11274-013-1309-1.
- 468 **Stanier** R.Y., Kunisawa R., Mandel M. and Cohen-Bazire G. (1971): Purification  
469 and properties of unicellular blue-green algae (Order Chroococcales).  
470 *Bacteriol. Rev.* 35: 171-205.
- 471 **Stocks-Fischer** S., Galinat J.K. and Bang S.S. (1999): Microbiological precipitation of  
472 CaCO<sub>3</sub>. *Soil Biol. Biochem.* 31:1563–1571. doi: 10.1016/S0038-0717(99)00082-  
473 6.
- 474 **Weyhenmeyer G. A.**, Hartmann J., Hessen D.o., Jiří Kopáček, Hejzlar J., Jacquet S.,  
475 Hamilton S.K., Verburg P., Leach T.H., Schmid M., Flaim G., Nöges T., Nöges P.,  
476 Wentzky V.C., Rogora M., Rusak J.A., Kosten S., Paterson A.M., Teubner K.,  
477 Higgins S.N., Lawrence G., Kangur K., Kokorite I., Cerasino L., Funk C., Harvey



478 R., Moatar F., de Wit H.A. and Zechmeister T. (2019): Widespread diminishing  
479 anthropogenic effects on calcium in freshwater. Scientific Reports, 9:10450.  
480 <https://doi.org/10.1038/s41598-019-46838-ws>

481 **Xu** H., Peng X., Bai S., Ta K., Yang S., Liu S., Jang H.B. and Guo Z. (2019).  
482 Precipitation of calcium carbonate mineral induced by viral lysis of cyanobacteria:  
483 evidence from laboratory experiments. Biogeosciences 16:949–960. doi:  
484 10.5194/bg-16-949-2019.

#### Author contribution:

The first author (R. A.-B.), designed the work, implemented the experiments and wrote the drafts, the second author (E.A.H.), helped in the experiments and calculated the standard errors, the third author (H.P. G.) hosted the first two authors in his lab in IGB and revised the manuscript.

#### Competing interests

There are no competing interests among authors.

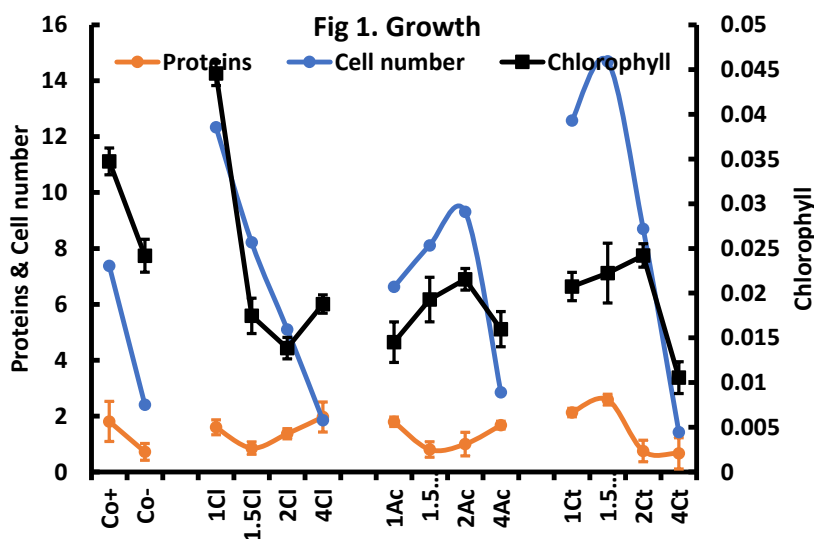



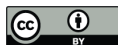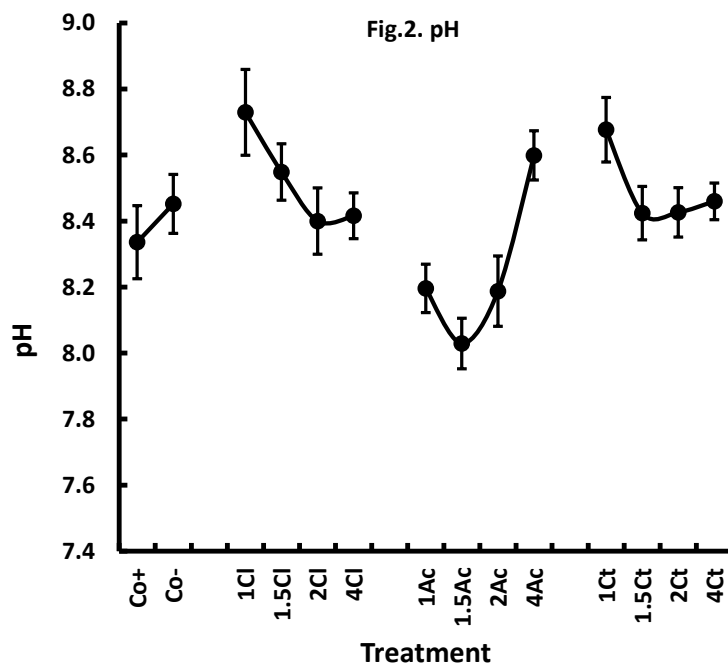

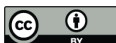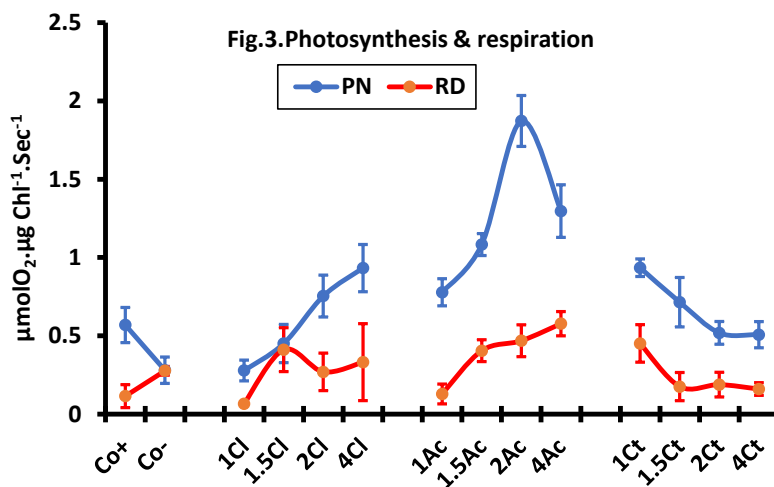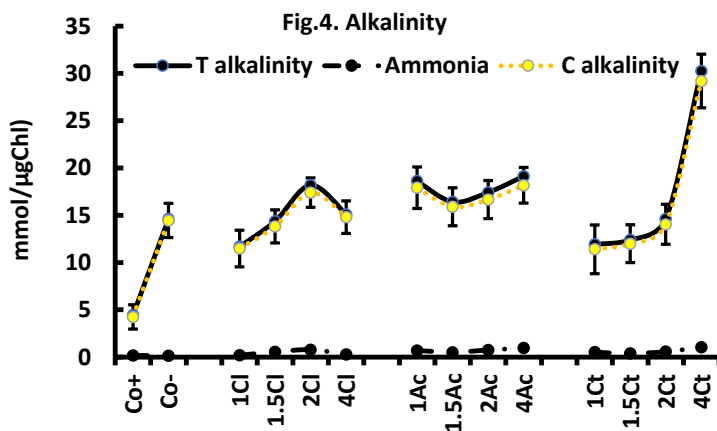

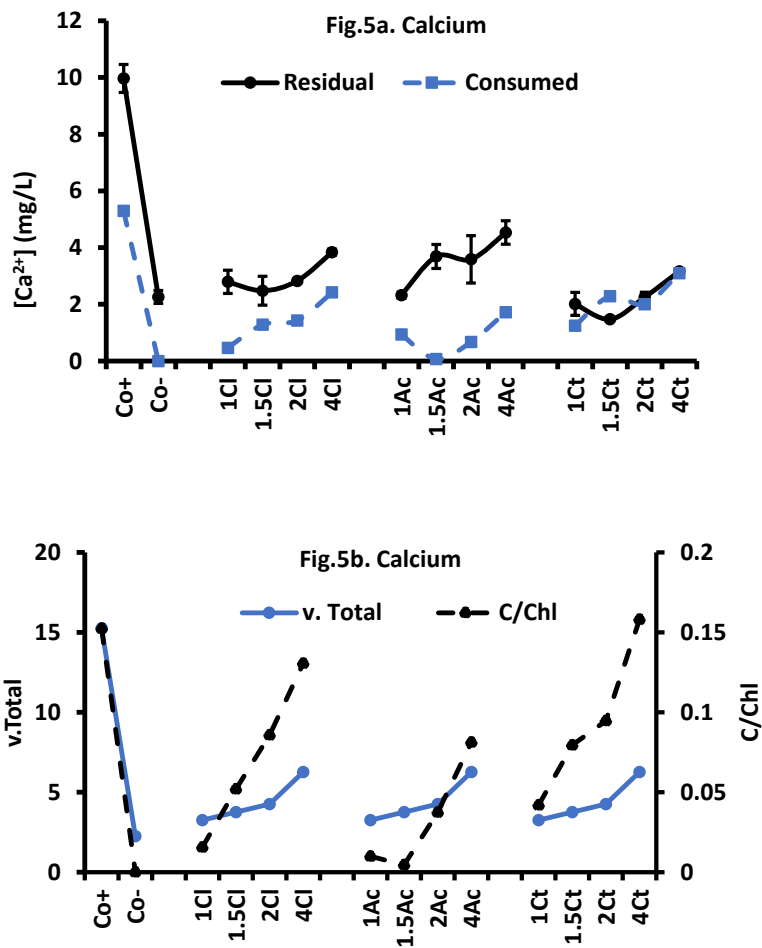

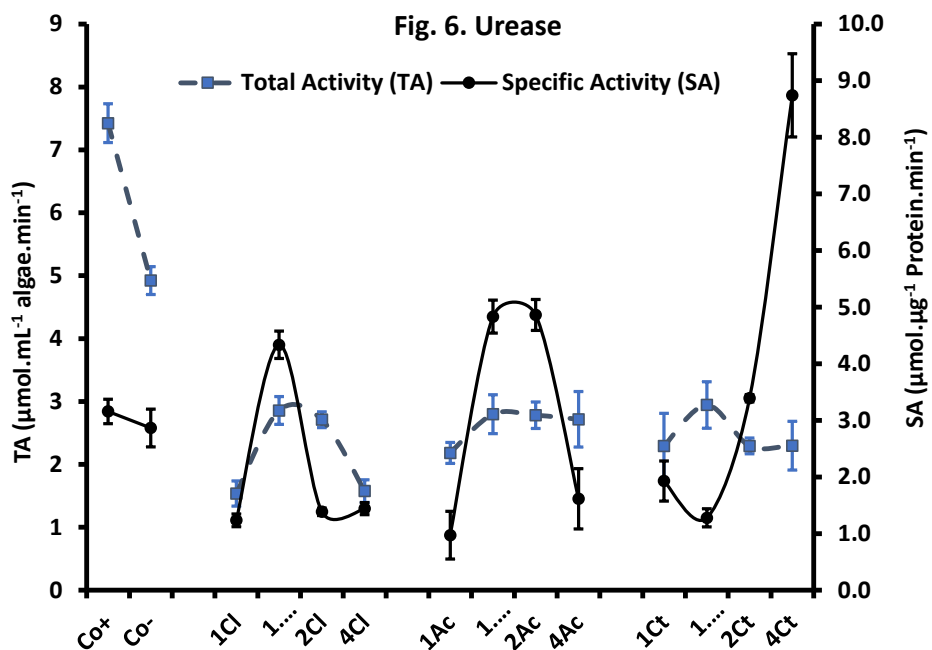

Supplement: Supplementary file [file bg-2020-378-RC3-supplement.pdf]
